# Supplementary material
Source: PubMed Central journal article supplement (PMC3138312)
Supplement: supp_M110.216184_jbc.M110.216184-1.pdf [file supp_M110.216184_jbc.M110.216184-1.pdf]

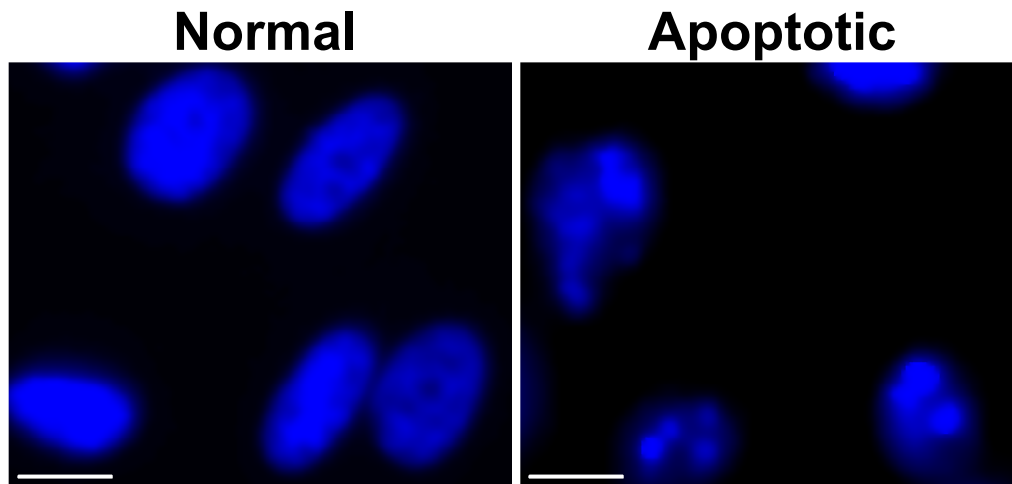

**Supplemental Figure 1:**

**Normal and fragmented nuclei as used to count cell death by microscopy in response to staurosporine (STS).** Determination of the percentage of cells with fragmented nuclei throughout this study involved counting the number of fragmented nuclei and total nuclei for numerous fields of view. Shown here is a field from normal and apoptotic (fragmented nuclei) cells. Bars represent 20 $\mu$ m.
